# Supplementary material for: Visceral adiposity index performed better than traditional adiposity indicators in predicting unhealthy metabolic phenotype among Chinese children and adolescents
Source: PubMed Central journal article supplement (PMC8668984; doi:10.1038/s41598-021-03311-x), 2021-12-13
Supplement: 41598_2021_3311_MOESM2_ESM.pdf [file 41598_2021_3311_MOESM2_ESM.pdf]

D2 Have you often eaten breakfast in the past six months?

0.No 1.Yes

D3

**D3 Smoking situation**

0.Never smoke

1.Try smoking (try smoking, even if only one or two mouthfuls)

2.Recent smoking (at least one cigarette in the past 30 days)

D4

**D4 Alcohol consumption**

0.Never drink alcohol

1. Try to drink alcohol (at least half a bottle or a beer, a small glass of white wine, etc)

2.Drink now (at least one drink in the past 30 days)

3.Heavy drinking (5 drinks in 2 hours on at least one of the last 30 days)

4.Drunkenness (drunkenness symptoms such as dizziness / headache / drowsiness due to excessive drinking in the past 12 months)

**D5 Meal survey the frequency of eating the following foods in the past 12 months?(Please fill in only one answer for each type of food. If you do not eat, please fill in the last column 0.If you eat less than once a day, please fill in how many times a week; If the frequency is less than once a week, please fill in how many times a month)**

|                                                                                  | Number of times/Day             | Number of times/Week             | Number of times/Month             | No food                  |
|----------------------------------------------------------------------------------|---------------------------------|----------------------------------|-----------------------------------|--------------------------|
| Meat/fowl (pigs, cattle, sheep, chickens, ducks, geese)                          | <input type="checkbox"/>        | <input type="checkbox"/>         | <input type="checkbox"/>          | <input type="checkbox"/> |
| Aquatic products (fish, shrimp, shellfish)                                       | <input type="checkbox"/>        | <input type="checkbox"/>         | <input type="checkbox"/>          | <input type="checkbox"/> |
| Eggs                                                                             | <input type="checkbox"/>        | <input type="checkbox"/>         | <input type="checkbox"/>          | <input type="checkbox"/> |
| Coarse grain (corn, millet, purple rice, sorghum)                                | <input type="checkbox"/>        | <input type="checkbox"/>         | <input type="checkbox"/>          | <input type="checkbox"/> |
| Fine grain (fine rice, white flour and its products)                             | <input type="checkbox"/>        | <input type="checkbox"/>         | <input type="checkbox"/>          | <input type="checkbox"/> |
| Milk and dairy products (fresh milk, milk powder, cheese)                        | <input type="checkbox"/>        | <input type="checkbox"/>         | <input type="checkbox"/>          | <input type="checkbox"/> |
| Fried food/Foreign fast food (sticks, fried chicken, hamburgers, etc)            | <input type="checkbox"/>        | <input type="checkbox"/>         | <input type="checkbox"/>          | <input type="checkbox"/> |
| Soy sauce/Sauce products (soy sauce, noodle sauce, meat sauce)                   | <input type="checkbox"/>        | <input type="checkbox"/>         | <input type="checkbox"/>          | <input type="checkbox"/> |
| Pickled vegetables and pickled products (pickled vegetables, bacon, salted eggs) | <input type="checkbox"/>        | <input type="checkbox"/>         | <input type="checkbox"/>          | <input type="checkbox"/> |
| Salty snacks (French fries, potato chips, biscuits)                              | <input type="checkbox"/>        | <input type="checkbox"/>         | <input type="checkbox"/>          | <input type="checkbox"/> |
| High-sugar foods (jam, cake, chocolate, candy, dessert, cola, juice, etc.)       | <input type="checkbox"/>        | <input type="checkbox"/>         | <input type="checkbox"/>          | <input type="checkbox"/> |
| Sugar (white sugar, brown sugar, honey, syrup)                                   | <input type="checkbox"/>        | <input type="checkbox"/>         | <input type="checkbox"/>          | <input type="checkbox"/> |
| Soybean products (soy milk, tofu, bean sprouts, peas, beans)                     | <input type="checkbox"/>        | <input type="checkbox"/>         | <input type="checkbox"/>          | <input type="checkbox"/> |
| Nuts (walnuts, almonds, chestnuts, melon seeds, peanuts, etc.)                   | <input type="checkbox"/>        | <input type="checkbox"/>         | <input type="checkbox"/>          | <input type="checkbox"/> |
| Sugary carbonated drinks (soda, cola, Sprite, etc.)                              | <input type="checkbox"/> ml/Day | <input type="checkbox"/> ml/Week | <input type="checkbox"/> ml/Month | <input type="checkbox"/> |
| Note: drink intake write down how many milliliters of (ml) to drink each time.   |                                 |                                  |                                   |                          |
| Fruit juice drinks (excl. pure fruit juices)                                     | <input type="checkbox"/> ml     | <input type="checkbox"/> ml      | <input type="checkbox"/> ml       | <input type="checkbox"/> |
| Fruit / pure fruit juice                                                         | <input type="checkbox"/>        | <input type="checkbox"/>         | <input type="checkbox"/>          | <input type="checkbox"/> |
| Leafy vegetables (spinach, cabbage, rape, etc.)                                  | <input type="checkbox"/>        | <input type="checkbox"/>         | <input type="checkbox"/>          | <input type="checkbox"/> |
| Non-leafy vegetables (raw)                                                       | <input type="checkbox"/>        | <input type="checkbox"/>         | <input type="checkbox"/>          | <input type="checkbox"/> |

|                                                                                    |                          |                          |                          |                          |
|------------------------------------------------------------------------------------|--------------------------|--------------------------|--------------------------|--------------------------|
| Non-leafy Vegetables (cooked)                                                      |                          |                          |                          | <input type="checkbox"/> |
| Calcium supplement preparation (such as calcium tablet, calcium oral liquid, etc.) | <input type="checkbox"/> | <input type="checkbox"/> | <input type="checkbox"/> | <input type="checkbox"/> |
| Vitamin D supplements (such as cod liver oil, vitamin D capsules, etc.)            | <input type="checkbox"/> | <input type="checkbox"/> | <input type="checkbox"/> | <input type="checkbox"/> |

**E. Physical activity and sleep (in the last half year)**

**E1 What are the main means of transportation for going to and from school?**

- 1.Walk
- 2.Cycling
- 3.Take a private car or bike
- 4.By bus

E1

**E2 The means of transportation and time used for going to and from school** (only counting activities that last more than 10 minutes each time, you can choose more than one)

E2-1 Cycling \_\_\_\_\_days / weeks; An average of \_\_\_\_\_ hours and \_\_\_\_\_minutes per day

E2-2 Walk \_\_\_\_\_days / weeks; An average of \_\_\_\_\_ hours and \_\_\_\_\_minutes per day

E2-3 Take a private car or bike \_\_\_\_\_days / weeks; An average of \_\_\_\_\_ hours and \_\_\_\_\_minutes per day

E2-4 By bus \_\_\_\_\_days / weeks; An average of \_\_\_\_\_ hours and \_\_\_\_\_minutes per day

**E3 On a weekly basis, the time you spend on the following physical exercises is (only counting activities that last more than 10 minutes at a time)**

E3-1 High-intensity physical exercise (medium-speed running, medium-speed swimming, football, basketball, badminton, etc.)  
\_\_\_\_\_days / weeks; An average of \_\_\_\_\_ hours and \_\_\_\_\_minutes per day

E3-2 Medium intensity physical exercise (fast walking, jogging, slow swimming, Taijiquan, table tennis, fan dance, ballroom dance, Yangko, etc.)  
\_\_\_\_\_days / weeks; An average of \_\_\_\_\_ hours and \_\_\_\_\_minutes per day

E3-3 Ordinary walking \_\_\_\_\_days / weeks; An average of \_\_\_\_\_ hours and \_\_\_\_\_minutes per day

**E4 Average daily time spent on the following activities (watching TV, using the computer, playing games, reading) \_\_\_\_\_ hours and \_\_\_\_\_minutes**

E5-1 When you are at school, you usually go to bed at night at \_\_\_\_\_

E5-2 When you are at school, you usually get up in the morning at \_\_\_\_\_

E6-1 Do you have the following sleep disorders? 0.No 1.Yes E6-1

**E6-2 Types of sleep disorders (You can choose more than one)**

- |                                                  |                                                   |                                     |
|--------------------------------------------------|---------------------------------------------------|-------------------------------------|
| 1.The time to fall asleep is more than 0.5 hours | 2.Sleep snoring                                   | 3.Open mouth and breathe            |
| 4.Suffocate to wake up                           | 5.Sleep apnea                                     | 6.Sleepwalking or having nightmares |
| 7.Limb twitching during sleep                    | 8.Excessive sweating                              | 9.Enuresis                          |
| 10.It is difficult to get up in the morning      | 11.Feel a headache when you get up in the morning |                                     |

**E7 Time for outdoor activities every day** \_\_\_\_\_days / weeks; An average of \_\_\_\_\_ hours and \_\_\_\_\_minutes per day

**F. Personal disease history**

|                                                                     |                                                                                                             |                                         |
|---------------------------------------------------------------------|-------------------------------------------------------------------------------------------------------------|-----------------------------------------|
| Types of diseases                                                   | Whether or not to suffer from the disease?                                                                  | Is there any drug treatment at present? |
| F1 Hypertension                                                     | 0.Yes 1.No F1 <input type="checkbox"/>                                                                      | 0.Yes 1.No <input type="checkbox"/>     |
| F2 Type 1 diabetes                                                  | 0.Yes 1.No F2 <input type="checkbox"/>                                                                      | 0.Yes 1.No <input type="checkbox"/>     |
| F3 Type 2 diabetes                                                  | 0.Yes 1.No F3 <input type="checkbox"/>                                                                      | 0.Yes 1.No <input type="checkbox"/>     |
| F4 Kidney disease                                                   | 0.Yes 1.No F4 <input type="checkbox"/>                                                                      | 0.Yes 1.No <input type="checkbox"/>     |
| F5 Heart disease (including congenital heart disease)               | 0.Yes 1.No F5 <input type="checkbox"/>                                                                      | 0.Yes 1.No <input type="checkbox"/>     |
| F6 Thyroid disease                                                  | 0.Yes 1.No F6 <input type="checkbox"/>                                                                      | 0.Yes 1.No <input type="checkbox"/>     |
| F7 Do you suffer from the following diseases in the past two weeks? | 0.Yes 1.No F7 <input type="checkbox"/>                                                                      |                                         |
| F8 Types of diseases (multiple choices)                             | 1. Catch a cold<br>2. Fever<br>3. Diarrhea<br>4. Skin trauma and infection.<br>5. Other infectious diseases |                                         |

| G. Family history of hypertension                                                           |                             |                             |                             |                              |                              |                              |
|---------------------------------------------------------------------------------------------|-----------------------------|-----------------------------|-----------------------------|------------------------------|------------------------------|------------------------------|
|                                                                                             | Father                      | Mother                      | Grandfather-in-law          | Grandmother-in-law           | Grandfather                  | Grandmother                  |
| Hypertension?<br>0.Yes 1.No                                                                 | G1 <input type="checkbox"/> | G2 <input type="checkbox"/> | G3 <input type="checkbox"/> | G4 <input type="checkbox"/>  | G5 <input type="checkbox"/>  | G6 <input type="checkbox"/>  |
| If there is high blood pressure, how to find it?<br>1. Self-test<br>2. Hospital examination | G7 <input type="checkbox"/> | G8 <input type="checkbox"/> | G9 <input type="checkbox"/> | G10 <input type="checkbox"/> | G11 <input type="checkbox"/> | G12 <input type="checkbox"/> |

| H. Parents and family situation                                                                                                                                                                                                                                                                                                                                                                                                         |                                                                                                                                                                                                                                                                                                                                                                                                                                                                                                                                                                                                                                                                                                                                                                                                                                                                                                                                                                                                                                                                                                                                                                                                                                                                                                                                                                                                                                                                                                                                                                                                                                                                    |        |        |             |                             |             |                             |             |                             |                                                                                                                                      |                             |                                                                                                                                                                                                                                                                                                                                                                                                                                         |                             |                     |                             |                                                                                                                                                                        |                             |                                       |                             |                                                                                                                                                                                        |                             |
|-----------------------------------------------------------------------------------------------------------------------------------------------------------------------------------------------------------------------------------------------------------------------------------------------------------------------------------------------------------------------------------------------------------------------------------------|--------------------------------------------------------------------------------------------------------------------------------------------------------------------------------------------------------------------------------------------------------------------------------------------------------------------------------------------------------------------------------------------------------------------------------------------------------------------------------------------------------------------------------------------------------------------------------------------------------------------------------------------------------------------------------------------------------------------------------------------------------------------------------------------------------------------------------------------------------------------------------------------------------------------------------------------------------------------------------------------------------------------------------------------------------------------------------------------------------------------------------------------------------------------------------------------------------------------------------------------------------------------------------------------------------------------------------------------------------------------------------------------------------------------------------------------------------------------------------------------------------------------------------------------------------------------------------------------------------------------------------------------------------------------|--------|--------|-------------|-----------------------------|-------------|-----------------------------|-------------|-----------------------------|--------------------------------------------------------------------------------------------------------------------------------------|-----------------------------|-----------------------------------------------------------------------------------------------------------------------------------------------------------------------------------------------------------------------------------------------------------------------------------------------------------------------------------------------------------------------------------------------------------------------------------------|-----------------------------|---------------------|-----------------------------|------------------------------------------------------------------------------------------------------------------------------------------------------------------------|-----------------------------|---------------------------------------|-----------------------------|----------------------------------------------------------------------------------------------------------------------------------------------------------------------------------------|-----------------------------|
|                                                                                                                                                                                                                                                                                                                                                                                                                                         | <table border="1"> <tr> <th>Father</th> <th>Mother</th> </tr> <tr> <td>Age (years)</td> <td>H1 <input type="checkbox"/></td> </tr> <tr> <td>Height (cm)</td> <td>H2 <input type="checkbox"/></td> </tr> <tr> <td>Weight (kg)</td> <td>H3 <input type="checkbox"/></td> </tr> <tr> <td>1. Never smoked.<br/>2. Try smoking (even if it's just one or two).<br/>3. Recent smoking (at least one cigarette in the past 30 days)</td> <td>H4 <input type="checkbox"/></td> </tr> <tr> <td>0. Never drank alcohol.<br/>1. Try drinking (have drunk at least half a bottle or a can of beer, a small cup of spirits, etc.)<br/>2. Drink now (have had at least one glass of wine in the past 30 days)<br/>3. Heavy drinking (at least five drinks in 2 hours on at least one day in the past 30 days)<br/>4. Drunkenness (symptoms of drunkenness such as dizziness/headache/drowsiness due to drinking too much in the past 12 months)</td> <td>H5 <input type="checkbox"/></td> </tr> <tr> <td>Degree of education</td> <td>H6 <input type="checkbox"/></td> </tr> <tr> <td>1. Graduated from junior high school and below<br/>2. Graduated from high school<br/>3. Graduated from junior college<br/>4. Graduated from college<br/>5. Graduate degree</td> <td>H7 <input type="checkbox"/></td> </tr> <tr> <td>Your family's annual income last year</td> <td>H8 <input type="checkbox"/></td> </tr> <tr> <td>1. &lt;20,000 yuan<br/>2. (2~2.9) ten thousand yuan<br/>3. (4-5.9) ten thousand yuan<br/>4. (6-9.9) ten thousand yuan<br/>5. (10-14.9) ten thousand yuan<br/>6. 15 ten thousand yuan and above</td> <td>H9 <input type="checkbox"/></td> </tr> </table> | Father | Mother | Age (years) | H1 <input type="checkbox"/> | Height (cm) | H2 <input type="checkbox"/> | Weight (kg) | H3 <input type="checkbox"/> | 1. Never smoked.<br>2. Try smoking (even if it's just one or two).<br>3. Recent smoking (at least one cigarette in the past 30 days) | H4 <input type="checkbox"/> | 0. Never drank alcohol.<br>1. Try drinking (have drunk at least half a bottle or a can of beer, a small cup of spirits, etc.)<br>2. Drink now (have had at least one glass of wine in the past 30 days)<br>3. Heavy drinking (at least five drinks in 2 hours on at least one day in the past 30 days)<br>4. Drunkenness (symptoms of drunkenness such as dizziness/headache/drowsiness due to drinking too much in the past 12 months) | H5 <input type="checkbox"/> | Degree of education | H6 <input type="checkbox"/> | 1. Graduated from junior high school and below<br>2. Graduated from high school<br>3. Graduated from junior college<br>4. Graduated from college<br>5. Graduate degree | H7 <input type="checkbox"/> | Your family's annual income last year | H8 <input type="checkbox"/> | 1. <20,000 yuan<br>2. (2~2.9) ten thousand yuan<br>3. (4-5.9) ten thousand yuan<br>4. (6-9.9) ten thousand yuan<br>5. (10-14.9) ten thousand yuan<br>6. 15 ten thousand yuan and above | H9 <input type="checkbox"/> |
| Father                                                                                                                                                                                                                                                                                                                                                                                                                                  | Mother                                                                                                                                                                                                                                                                                                                                                                                                                                                                                                                                                                                                                                                                                                                                                                                                                                                                                                                                                                                                                                                                                                                                                                                                                                                                                                                                                                                                                                                                                                                                                                                                                                                             |        |        |             |                             |             |                             |             |                             |                                                                                                                                      |                             |                                                                                                                                                                                                                                                                                                                                                                                                                                         |                             |                     |                             |                                                                                                                                                                        |                             |                                       |                             |                                                                                                                                                                                        |                             |
| Age (years)                                                                                                                                                                                                                                                                                                                                                                                                                             | H1 <input type="checkbox"/>                                                                                                                                                                                                                                                                                                                                                                                                                                                                                                                                                                                                                                                                                                                                                                                                                                                                                                                                                                                                                                                                                                                                                                                                                                                                                                                                                                                                                                                                                                                                                                                                                                        |        |        |             |                             |             |                             |             |                             |                                                                                                                                      |                             |                                                                                                                                                                                                                                                                                                                                                                                                                                         |                             |                     |                             |                                                                                                                                                                        |                             |                                       |                             |                                                                                                                                                                                        |                             |
| Height (cm)                                                                                                                                                                                                                                                                                                                                                                                                                             | H2 <input type="checkbox"/>                                                                                                                                                                                                                                                                                                                                                                                                                                                                                                                                                                                                                                                                                                                                                                                                                                                                                                                                                                                                                                                                                                                                                                                                                                                                                                                                                                                                                                                                                                                                                                                                                                        |        |        |             |                             |             |                             |             |                             |                                                                                                                                      |                             |                                                                                                                                                                                                                                                                                                                                                                                                                                         |                             |                     |                             |                                                                                                                                                                        |                             |                                       |                             |                                                                                                                                                                                        |                             |
| Weight (kg)                                                                                                                                                                                                                                                                                                                                                                                                                             | H3 <input type="checkbox"/>                                                                                                                                                                                                                                                                                                                                                                                                                                                                                                                                                                                                                                                                                                                                                                                                                                                                                                                                                                                                                                                                                                                                                                                                                                                                                                                                                                                                                                                                                                                                                                                                                                        |        |        |             |                             |             |                             |             |                             |                                                                                                                                      |                             |                                                                                                                                                                                                                                                                                                                                                                                                                                         |                             |                     |                             |                                                                                                                                                                        |                             |                                       |                             |                                                                                                                                                                                        |                             |
| 1. Never smoked.<br>2. Try smoking (even if it's just one or two).<br>3. Recent smoking (at least one cigarette in the past 30 days)                                                                                                                                                                                                                                                                                                    | H4 <input type="checkbox"/>                                                                                                                                                                                                                                                                                                                                                                                                                                                                                                                                                                                                                                                                                                                                                                                                                                                                                                                                                                                                                                                                                                                                                                                                                                                                                                                                                                                                                                                                                                                                                                                                                                        |        |        |             |                             |             |                             |             |                             |                                                                                                                                      |                             |                                                                                                                                                                                                                                                                                                                                                                                                                                         |                             |                     |                             |                                                                                                                                                                        |                             |                                       |                             |                                                                                                                                                                                        |                             |
| 0. Never drank alcohol.<br>1. Try drinking (have drunk at least half a bottle or a can of beer, a small cup of spirits, etc.)<br>2. Drink now (have had at least one glass of wine in the past 30 days)<br>3. Heavy drinking (at least five drinks in 2 hours on at least one day in the past 30 days)<br>4. Drunkenness (symptoms of drunkenness such as dizziness/headache/drowsiness due to drinking too much in the past 12 months) | H5 <input type="checkbox"/>                                                                                                                                                                                                                                                                                                                                                                                                                                                                                                                                                                                                                                                                                                                                                                                                                                                                                                                                                                                                                                                                                                                                                                                                                                                                                                                                                                                                                                                                                                                                                                                                                                        |        |        |             |                             |             |                             |             |                             |                                                                                                                                      |                             |                                                                                                                                                                                                                                                                                                                                                                                                                                         |                             |                     |                             |                                                                                                                                                                        |                             |                                       |                             |                                                                                                                                                                                        |                             |
| Degree of education                                                                                                                                                                                                                                                                                                                                                                                                                     | H6 <input type="checkbox"/>                                                                                                                                                                                                                                                                                                                                                                                                                                                                                                                                                                                                                                                                                                                                                                                                                                                                                                                                                                                                                                                                                                                                                                                                                                                                                                                                                                                                                                                                                                                                                                                                                                        |        |        |             |                             |             |                             |             |                             |                                                                                                                                      |                             |                                                                                                                                                                                                                                                                                                                                                                                                                                         |                             |                     |                             |                                                                                                                                                                        |                             |                                       |                             |                                                                                                                                                                                        |                             |
| 1. Graduated from junior high school and below<br>2. Graduated from high school<br>3. Graduated from junior college<br>4. Graduated from college<br>5. Graduate degree                                                                                                                                                                                                                                                                  | H7 <input type="checkbox"/>                                                                                                                                                                                                                                                                                                                                                                                                                                                                                                                                                                                                                                                                                                                                                                                                                                                                                                                                                                                                                                                                                                                                                                                                                                                                                                                                                                                                                                                                                                                                                                                                                                        |        |        |             |                             |             |                             |             |                             |                                                                                                                                      |                             |                                                                                                                                                                                                                                                                                                                                                                                                                                         |                             |                     |                             |                                                                                                                                                                        |                             |                                       |                             |                                                                                                                                                                                        |                             |
| Your family's annual income last year                                                                                                                                                                                                                                                                                                                                                                                                   | H8 <input type="checkbox"/>                                                                                                                                                                                                                                                                                                                                                                                                                                                                                                                                                                                                                                                                                                                                                                                                                                                                                                                                                                                                                                                                                                                                                                                                                                                                                                                                                                                                                                                                                                                                                                                                                                        |        |        |             |                             |             |                             |             |                             |                                                                                                                                      |                             |                                                                                                                                                                                                                                                                                                                                                                                                                                         |                             |                     |                             |                                                                                                                                                                        |                             |                                       |                             |                                                                                                                                                                                        |                             |
| 1. <20,000 yuan<br>2. (2~2.9) ten thousand yuan<br>3. (4-5.9) ten thousand yuan<br>4. (6-9.9) ten thousand yuan<br>5. (10-14.9) ten thousand yuan<br>6. 15 ten thousand yuan and above                                                                                                                                                                                                                                                  | H9 <input type="checkbox"/>                                                                                                                                                                                                                                                                                                                                                                                                                                                                                                                                                                                                                                                                                                                                                                                                                                                                                                                                                                                                                                                                                                                                                                                                                                                                                                                                                                                                                                                                                                                                                                                                                                        |        |        |             |                             |             |                             |             |                             |                                                                                                                                      |                             |                                                                                                                                                                                                                                                                                                                                                                                                                                         |                             |                     |                             |                                                                                                                                                                        |                             |                                       |                             |                                                                                                                                                                                        |                             |

9. Unknown

The population of your family(resident population) \_\_\_\_\_

H14

Fill in the time invest \_\_\_\_\_ Investigator: \_\_\_\_\_
